# Supplementary material
Source: publisher figshare collection journal article supplement (https://gsajournals.figshare.com/ndownloader/files/13996805)
Supplement: Supplementary file 1 [file 13996805]

## Sheet: Sheet1
DATE ADDED TO CATALOG	PUBMEDID	FIRST AUTHOR	DATE	JOURNAL	LINK	STUDY	trait	INITIAL SAMPLE SIZE
2011-10-26	21980299	Bradfield JP	2011-09-29	PLoS Genet	www.ncbi.nlm.nih.gov/pubmed/21980299	A genome-wide meta-analysis of six type 1 diabetes cohorts identifies multiple associated loci.	Type_1_diabetes	9,934 European ancestry cases, 16,956 European ancestry controls
2011-12-17	22101970	Kho AN	2011-11-19	J Am Med Inform Assoc	www.ncbi.nlm.nih.gov/pubmed/22101970	Use of diverse electronic medical record systems to identify genetic risk for type 2 diabetes within a genome-wide association study.	Type_2_diabetes	2,413 European ancestry cases, 2,392 European ancestry controls, 810 African American cases, 873 African American controls
2010-11-17	20935630	Speliotes EK	2010-10-10	Nat Genet	www.ncbi.nlm.nih.gov/pubmed/20935630	Association analyses of 249,796 individuals reveal 18 new loci associated with body mass index.	BMI	Up to 123,865 European ancestry individuals
2008-06-16	18372903	Zeggini E	2008-03-30	Nat Genet	www.ncbi.nlm.nih.gov/pubmed/18372903	Meta-analysis of genome-wide association data and large-scale replication identifies additional susceptibility loci for type 2 diabetes.	Type_2_diabetes	4,549 European ancestry cases, 5,579 European ancestry controls
2008-06-16	18311140	Hunt KA	2008-03-02	Nat Genet	www.ncbi.nlm.nih.gov/pubmed/18311140	Newly identified genetic risk variants for celiac disease related to the immune response.	Celiac_disease	767 European ancestry cases, 1,422 European ancestry controls
2008-06-16	18204446	Harley JB	2008-01-20	Nat Genet	www.ncbi.nlm.nih.gov/pubmed/18204446	Genome-wide association scan in women with systemic lupus erythematosus identifies susceptibility variants in ITGAM, PXK, KIAA1542 and other loci.	Systemic_lupus_erythematosus	720 European ancestry female cases, 2,337 European ancestry female controls
2008-06-16	18204098	Hom G	2008-01-20	N Engl J Med	www.ncbi.nlm.nih.gov/pubmed/18204098	Association of systemic lupus erythematosus with C8orf13-BLK and ITGAM-ITGAX.	Systemic_lupus_erythematosus	1,311 European ancestry cases, 3,340 European ancestry controls
2008-06-16	18204447	Kozyrev SV	2008-01-20	Nat Genet	www.ncbi.nlm.nih.gov/pubmed/18204447	Functional variants in the B-cell gene BANK1 are associated with systemic lupus erythematosus.	Systemic_lupus_erythematosus	279 European ancestry cases, 515 European ancestry controls
2008-06-16	18198356	Hakonarson H	2008-01-15	Diabetes	www.ncbi.nlm.nih.gov/pubmed/18198356	A novel susceptibility locus for type 1 diabetes on Chr12q13 identified by a genome-wide association study.	Type_1_diabetes	467 European ancestry trios, 561 European ancestry cases, 1,143 European ancestry controls
2008-06-16	17982456	Plenge RM	2007-11-04	Nat Genet	www.ncbi.nlm.nih.gov/pubmed/17982456	Two independent alleles at 6q23 associated with risk of rheumatoid arthritis.	Rheumatoid_arthritis	397 European ancestry cases, 1,211 controls
2008-09-17	17903300	Fox CS	2007-09-19	BMC Med Genet	www.ncbi.nlm.nih.gov/pubmed/17903300	Genome-wide association to body mass index and waist circumference: the Framingham Heart Study 100K project.	BMI	1,341 European ancestry individuals from 310 families
2008-06-16	17804836	Plenge RM	2007-09-05	N Engl J Med	www.ncbi.nlm.nih.gov/pubmed/17804836	TRAF1-C5 as a risk locus for rheumatoid arthritis--a genomewide study.	Rheumatoid_arthritis	1,522 European ancestry cases, 1,850 European ancestry controls
2008-06-16	17632545	Hakonarson H	2007-07-15	Nature	www.ncbi.nlm.nih.gov/pubmed/17632545	A genome-wide association study identifies KIAA0350 as a type 1 diabetes gene.	Type_1_diabetes	467 European ancestry trios, 561 European ancestry cases, 1,143 European ancestry controls
2008-06-16	17558408	van Heel DA	2007-06-10	Nat Genet	www.ncbi.nlm.nih.gov/pubmed/17558408	A genome-wide association study for celiac disease identifies risk variants in the region harboring IL2 and IL21.	Celiac_disease	778 European ancestry cases, 1,422 European ancestry controls
2008-06-16	17554300	Wellcome Trust Case Control Consortium	2007-06-07	Nature	www.ncbi.nlm.nih.gov/pubmed/17554300	Genome-wide association study of 14,000 cases of seven common diseases and 3,000 shared controls.	Crohn_s_disease	1,748 European ancestry cases, 2,938 European ancestry controls
2008-06-16	17554300	Wellcome Trust Case Control Consortium	2007-06-07	Nature	www.ncbi.nlm.nih.gov/pubmed/17554300	Genome-wide association study of 14,000 cases of seven common diseases and 3,000 shared controls.	Rheumatoid_arthritis	1,860 European ancestry cases, 2,938 European ancestry controls
2008-06-16	17554300	Wellcome Trust Case Control Consortium	2007-06-07	Nature	www.ncbi.nlm.nih.gov/pubmed/17554300	Genome-wide association study of 14,000 cases of seven common diseases and 3,000 shared controls.	Type_1_diabetes	1,963 European ancestry cases, 2,938 European ancestry controls
2008-06-16	17554300	Wellcome Trust Case Control Consortium	2007-06-07	Nature	www.ncbi.nlm.nih.gov/pubmed/17554300	Genome-wide association study of 14,000 cases of seven common diseases and 3,000 shared controls.	Type_2_diabetes	1,924 European ancestry cases, 2,938 European ancestry controls
2008-06-16	17554260	Todd JA	2007-06-06	Nat Genet	www.ncbi.nlm.nih.gov/pubmed/17554260	Robust associations of four new chromosome regions from genome-wide analyses of type 1 diabetes.	Type_1_diabetes	2,000 European ancestry cases, 3,000 European ancestry controls
2008-06-16	17463246	Saxena R	2007-04-26	Science	www.ncbi.nlm.nih.gov/pubmed/17463246	Genome-wide association analysis identifies loci for type 2 diabetes and triglyceride levels.	Type_2_diabetes	1,464 European ancestry cases, 1,467 European ancestry controls
2008-06-16	17460697	Steinthorsdottir V	2007-04-26	Nat Genet	www.ncbi.nlm.nih.gov/pubmed/17460697	A variant in CDKAL1 influences insulin response and risk of type 2 diabetes.	Type_2_diabetes	1,399 European ancestry cases, 5,275 European ancestry controls
2009-09-28	17434869	Frayling TM	2007-04-12	Science	www.ncbi.nlm.nih.gov/pubmed/17434869	A common variant in the FTO gene is associated with body mass index and predisposes to childhood and adult obesity.	BMI	5,483 European ancestry type 2 diabetes cases, 5,174 European ancestry controls
2008-06-16	17447842	Libioulle C	2007-03-05	PLoS Genet	www.ncbi.nlm.nih.gov/pubmed/17447842	Novel Crohn disease locus identified by genome-wide association maps to a gene desert on 5p13.1 and modulates expression of PTGER4.	Crohn_s_disease	547 European ancestry cases, 928 European ancestry controls
2008-06-16	17293876	Sladek R	2007-02-11	Nature	www.ncbi.nlm.nih.gov/pubmed/17293876	A genome-wide association study identifies novel risk loci for type 2 diabetes.	Type_2_diabetes	661 European ancestry cases, 614 European ancestry controls
2008-06-22	18454148	Loos RJ	2008-05-04	Nat Genet	www.ncbi.nlm.nih.gov/pubmed/18454148	Common variants near MC4R are associated with fat mass, weight and risk of obesity.	BMI	16,876 European ancestry adult individuals
2008-07-11	18587394	Barrett JC	2008-06-29	Nat Genet	www.ncbi.nlm.nih.gov/pubmed/18587394	Genome-wide association defines more than 30 distinct susceptibility loci for Crohn's disease.	Crohn_s_disease	3,230 European ancestry cases, 4,829 European ancestry controls
2008-08-11	18668548	Julia A	2008-08-01	Arthritis Rheum	www.ncbi.nlm.nih.gov/pubmed/18668548	Genome-wide association study of rheumatoid arthritis in the Spanish population: KLF12 as a risk locus for rheumatoid arthritis susceptibility.	Rheumatoid_arthritis	400 European ancestry cases, 400 European ancestry controls
2008-08-27	19165918	Graham RR	2008-08-01	Nat Genet	www.ncbi.nlm.nih.gov/pubmed/19165918	Genetic variants near TNFAIP3 on 6q23 are associated with systemic lupus erythematosus.	Systemic_lupus_erythematosus	431 European ancestry cases, 2,155 European ancestry controls
2008-09-09	17668382	Salonen JT	2007-06-26	Am J Hum Genet	www.ncbi.nlm.nih.gov/pubmed/17668382	Type 2 diabetes whole-genome association study in four populations: the DiaGen consortium.	Type_2_diabetes	201 Finland founder cases, 200 Finland founder controls, 200 Ashkenazi Jewish cases, 197 Ashkenazi Jewish controls, 99 European ancestry cases, 100 European ancestry controls
2008-09-10	17684544	Franke A	2007-08-08	PLoS One	www.ncbi.nlm.nih.gov/pubmed/17684544	Systematic association mapping identifies NELL1 as a novel IBD disease gene.	Crohn_s_disease	393 European ancestry cases, 399 European ancestry controls
2008-06-16	17463249	Zeggini E	2007-04-26	Science	www.ncbi.nlm.nih.gov/pubmed/17463249	Replication of genome-wide association signals in UK samples reveals risk loci for type 2 diabetes.	Type_2_diabetes	1,924 European ancestry cases, 2,938 European ancestry controls
2008-09-25	18794853	Raychaudhuri S	2008-09-14	Nat Genet	www.ncbi.nlm.nih.gov/pubmed/18794853	Common variants at CD40 and other loci confer risk of rheumatoid arthritis.	Rheumatoid_arthritis	3,393 European ancestry cases, 12,460 European ancestry controls
2008-11-11	18840781	Grant SF	2008-10-07	Diabetes	www.ncbi.nlm.nih.gov/pubmed/18840781	Follow-up analysis of genome-wide association data identifies novel loci for type 1 diabetes.	Type_1_diabetes	563 European ancestry cases, 1,146 European ancestry controls, 483 European ancestry trios
2008-11-26	18978792	Cooper JD	2008-11-02	Nat Genet	www.ncbi.nlm.nih.gov/pubmed/18978792	Meta-analysis of genome-wide association study data identifies additional type 1 diabetes risk loci.	Type_1_diabetes	3,561 European ancestry cases, 4,646 European ancestry controls
2009-01-12	19079261	Willer CJ	2008-12-14	Nat Genet	www.ncbi.nlm.nih.gov/pubmed/19079261	Six new loci associated with body mass index highlight a neuronal influence on body weight regulation.	BMI	32,387 European ancestry individuals
2009-01-15	19056611	Timpson NJ	2008-12-03	Diabetes	www.ncbi.nlm.nih.gov/pubmed/19056611	Adiposity-related heterogeneity in patterns of type 2 diabetes susceptibility observed in genome-wide association data.	Type_2_diabetes	958 European ancestry obese cases, 955 European ancestry non-obese cases, 2,938 European ancestry controls
2012-03-09	22293688	Huang J	2012-02-01	Eur J Hum Genet	www.ncbi.nlm.nih.gov/pubmed/22293688	1000 Genomes-based imputation identifies novel and refined associations for the Wellcome Trust Case Control Consortium phase 1 Data.	Type_1_diabetes	16,179 European ancestry individuals
2012-03-10	22293688	Huang J	2012-02-01	Eur J Hum Genet	www.ncbi.nlm.nih.gov/pubmed/22293688	1000 Genomes-based imputation identifies novel and refined associations for the Wellcome Trust Case Control Consortium phase 1 Data.	Type_2_diabetes	16,179 European ancestry individuals
2012-03-10	22293688	Huang J	2012-02-01	Eur J Hum Genet	www.ncbi.nlm.nih.gov/pubmed/22293688	1000 Genomes-based imputation identifies novel and refined associations for the Wellcome Trust Case Control Consortium phase 1 Data.	Crohn_s_disease	16,179 European ancestry individuals
2012-04-18	22446040	Wang KS	2012-03-16	Gene	www.ncbi.nlm.nih.gov/pubmed/22446040	A novel locus for body mass index on 5p15.2: a meta-analysis of two genome-wide association studies.	BMI	5,218 European ancestry individuals
2009-06-01	19430480	Barrett JC	2009-05-10	Nat Genet	www.ncbi.nlm.nih.gov/pubmed/19430480	Genome-wide association study and meta-analysis find that over 40 loci affect risk of type 1 diabetes.	Type_1_diabetes	7,514 European ancestry cases, 9,045 European ancestry controls
2009-06-17	19503088	Gregersen PK	2009-06-07	Nat Genet	www.ncbi.nlm.nih.gov/pubmed/19503088	REL, encoding a member of the NF-kappaB family of transcription factors, is a newly defined risk locus for rheumatoid arthritis.	Rheumatoid_arthritis	2,418 European ancestry cases, 4,504 European ancestry controls
2008-06-16	17463248	Scott LJ	2007-04-26	Science	www.ncbi.nlm.nih.gov/pubmed/17463248	A genome-wide association study of type 2 diabetes in Finns detects multiple susceptibility variants.	Type_2_diabetes	1,161 European ancestry cases, 1,174 European ancestry controls
2011-04-07	21408207	Chung SA	2011-03-03	PLoS Genet	www.ncbi.nlm.nih.gov/pubmed/21408207	Differential genetic associations for systemic lupus erythematosus based on anti-dsDNA autoantibody production.	Systemic_lupus_erythematosus	811 anti-dsDNA positive European ancestry cases, 906 anti-dsDNA negative European ancestry cases, 4,813 European ancestry controls
2014-10-23	24509480	Mahajan A	2014-02-09	Nat Genet	www.ncbi.nlm.nih.gov/pubmed/24509480	Genome-wide trans-ancestry meta-analysis provides insight into the genetic architecture of type 2 diabetes susceptibility.	Type_2_diabetes	12,171 European ancestry cases, 56,862 European ancestry controls, 6,952 East Asian ancestry cases, 11,865 East Asian ancestry controls, 5,561 South Asian ancestry cases, 14,458 South Asian ancestry controls, 1,804 Mexican ancestry cases, 779 Mexican ancestry controls
2014-07-02	21156761	Padyukov L	2010-12-14	Ann Rheum Dis	www.ncbi.nlm.nih.gov/pubmed/21156761	A genome-wide association study suggests contrasting associations in ACPA-positive versus ACPA-negative rheumatoid arthritis.	Rheumatoid_arthritis	1,147 European ancestry ACPA positive RA cases, 774 European ancestry ACPA negative RA cases, 1,079 European ancestry controls
2014-07-29	24348519	Namjou B	2013-12-03	Front Genet	www.ncbi.nlm.nih.gov/pubmed/24348519	EMR-linked GWAS study: investigation of variation landscape of loci for body mass index in children.	BMI	up to 2,860 European ancestry children
2014-08-05	24390342	Okada Y	2013-12-25	Nature	www.ncbi.nlm.nih.gov/pubmed/24390342	Genetics of rheumatoid arthritis contributes to biology and drug discovery.	Rheumatoid_arthritis	up to 14,361 European ancestry cases, up to 42,923 European ancestry controls, up to 4,873 East Asian ancestry cases, up to 17,642 East Asian ancestry controls
2013-11-03	23669352	Graff M	2013-05-12	Hum Mol Genet	www.ncbi.nlm.nih.gov/pubmed/23669352	Genome-wide analysis of BMI in adolescents and young adults reveals additional insight into the effects of genetic loci over the life course.	BMI	Up to 13,627 European ancestry individuals
2014-04-25	24064335	Pei YF	2013-10-08	Hum Mol Genet	www.ncbi.nlm.nih.gov/pubmed/24064335	Meta-analysis of genome-wide association data identifies novel susceptibility loci for obesity.	BMI	8,463 European ancestry individuals, 7,478 African American individuals, 3,348 Hispanic individuals, 1,624 Han Chinese ancestry individuals
2013-09-12	23563607	Berndt SI	2013-04-07	Nat Genet	www.ncbi.nlm.nih.gov/pubmed/23563607	Genome-wide meta-analysis identifies 11 new loci for anthropometric traits and provides insights into genetic architecture.	BMI	7,962 European ancestry high body mass index individuals, 8,106 European ancestry low body mass index individuals
2009-11-18	19851299	Johansson A	2009-10-22	Obesity (Silver Spring)	www.ncbi.nlm.nih.gov/pubmed/19851299	Linkage and genome-wide association analysis of obesity-related phenotypes: association of weight with the MGAT1 gene.	BMI	1,079 South Tyrolian individuals, 790 Dutch founder individuals, 2,060 European ancestry individuals
2009-12-28	19966805	Wallace C	2009-12-06	Nat Genet	www.ncbi.nlm.nih.gov/pubmed/19966805	The imprinted DLK1-MEG3 gene region on chromosome 14q32.2 alters susceptibility to type 1 diabetes.	Type_1_diabetes	7,514 European ancestry cases, 9,045 European ancestry controls
2010-03-29	20190752	Dubois PC	2010-02-28	Nat Genet	www.ncbi.nlm.nih.gov/pubmed/20190752	Multiple common variants for celiac disease influencing immune gene expression.	Celiac_disease	4,533 European ancestry cases, 10,750 European ancestry controls
2010-05-11	20397748	Liu JZ	2010-04-01	Twin Res Hum Genet	www.ncbi.nlm.nih.gov/pubmed/20397748	Genome-wide association study of height and body mass index in Australian twin families.	BMI	11,536 European ancestry individuals
2010-06-13	20453842	Stahl EA	2010-05-09	Nat Genet	www.ncbi.nlm.nih.gov/pubmed/20453842	Genome-wide association study meta-analysis identifies seven new rheumatoid arthritis risk loci.	Rheumatoid_arthritis	5,539 European ancestry cases, 20,169 European ancestry controls
2010-05-23	20418489	Qi L	2010-04-23	Hum Mol Genet	www.ncbi.nlm.nih.gov/pubmed/20418489	Genetic variants at 2q24 are associated with susceptibility to type 2 diabetes.	Type_2_diabetes	2,591 European ancestry cases, 3,052 European ancestry controls
2010-07-12	20570966	McGovern DP	2010-06-22	Hum Mol Genet	www.ncbi.nlm.nih.gov/pubmed/20570966	Fucosyltransferase 2 (FUT2) non-secretor status is associated with Crohn's disease.	Crohn_s_disease	896 European ancestry cases, 3,204 European ancestry controls
2010-07-12	20581827	Voight BF	2010-06-27	Nat Genet	www.ncbi.nlm.nih.gov/pubmed/20581827	Twelve type 2 diabetes susceptibility loci identified through large-scale association analysis.	Type_2_diabetes	8,130 European ancestry cases, 38,987 European ancestry controls
2014-10-10	24449572	Orozco G	2014-01-01	Arthritis Rheumatol	www.ncbi.nlm.nih.gov/pubmed/24449572	Novel rheumatoid arthritis susceptibility locus at 22q12 identified in an extended UK genome-wide association study.	Rheumatoid_arthritis	3,034 European ancestry cases, 5,271 European ancestry controls
2014-11-26	24871463	Armstrong DL	2014-05-29	Genes Immun	www.ncbi.nlm.nih.gov/pubmed/24871463	GWAS identifies novel SLE susceptibility genes and explains the association of the HLA region.	Systemic_lupus_erythematosus	725 European ancestry cases, 2,438 European ancestry controls
2015-02-04	24999842	Garner C	2014-07-07	PLoS One	www.ncbi.nlm.nih.gov/pubmed/24999842	Genome-wide association study of celiac disease in North America confirms FRMD4B as new celiac locus.	Celiac_disease	1,550 European ancestry cases, 3,084 European ancestry controls
2012-10-19	21102463	Franke A	2010-11-21	Nat Genet	www.ncbi.nlm.nih.gov/pubmed/21102463	Genome-wide meta-analysis increases to 71 the number of confirmed Crohn's disease susceptibility loci.	Crohn_s_disease	6,333 European ancestry cases, 15,056 European ancestry controls
2012-11-16	22936669	Julia A	2012-08-30	Gut	www.ncbi.nlm.nih.gov/pubmed/22936669	A genome-wide association study on a southern European population identifies a new Crohn's disease susceptibility locus at RBX1-EP300.	Crohn_s_disease	1,277 European ancestry cases, 1,488 European ancestry controls
2012-11-30	22982992	Yang J	2012-09-12	Nature	www.ncbi.nlm.nih.gov/pubmed/22982992	FTO genotype is associated with phenotypic variability of body mass index.	BMI	133,154 European ancestry individuals
2013-01-09	23053960	Lee YH	2012-10-07	Mol Biol Rep	www.ncbi.nlm.nih.gov/pubmed/23053960	Genome-wide pathway analysis of genome-wide association studies on systemic lupus erythematosus and rheumatoid arthritis.	Systemic_lupus_erythematosus	1,527 European ancestry cases, 3,421 European ancestry controls,
2013-02-12	23128233	Jostins L	2012-11-01	Nature	www.ncbi.nlm.nih.gov/pubmed/23128233	Host-microbe interactions have shaped the genetic architecture of inflammatory bowel disease.	Crohn_s_disease	Up to 12,924 European ancestry cases, up to 21,442 European ancestry controls
2013-03-19	23209189	Tabassum R	2012-12-03	Diabetes	www.ncbi.nlm.nih.gov/pubmed/23209189	Genome-wide association study for type 2 diabetes in Indians identifies a new susceptibility locus at 2q21.	Type_2_diabetes	1,101 Indo-European ancestry cases, 1,027 Indo-European ancestry controls
2014-03-20	23936387	Ostensson M	2013-08-02	PLoS One	www.ncbi.nlm.nih.gov/pubmed/23936387	A possible mechanism behind autoimmune disorders discovered by genome-wide linkage and association analysis in celiac disease.	Celiac_disease	206 European ancestry trios
2016-09-23	26502338	Bentham J	2015-10-26	Nat Genet	www.ncbi.nlm.nih.gov/pubmed/26502338	Genetic association analyses implicate aberrant regulation of innate and adaptive immunity genes in the pathogenesis of systemic lupus erythematosus.	Systemic_lupus_erythematosus	5,201 European ancestry cases, 9,066 European ancestry controls
2009-01-15	19079260	Thorleifsson G	2008-12-14	Nat Genet	www.ncbi.nlm.nih.gov/pubmed/19079260	Genome-wide association yields new sequence variants at seven loci that associate with measures of obesity.	BMI	72,598 European ancestry individuals, 1,160 African American individuals
2016-07-15	26316170	Demirci FY	2015-08-28	Arthritis Rheumatol	www.ncbi.nlm.nih.gov/pubmed/26316170	Identification of a New Susceptibility Locus for Systemic Lupus Erythematosus on Chromosome 12 in Individuals of European Ancestry.	Systemic_lupus_erythematosus	661 European ancestry cases, 487 European ancestry controls
2016-07-24	26192919	Liu JZ	2015-07-20	Nat Genet	www.ncbi.nlm.nih.gov/pubmed/26192919	Association analyses identify 38 susceptibility loci for inflammatory bowel disease and highlight shared genetic risk across populations.	Crohn_s_disease	5,956 European ancestry cases, 14,927 European ancestry controls
2011-09-21	21829393	Plagnol V	2011-08-04	PLoS Genet	www.ncbi.nlm.nih.gov/pubmed/21829393	Genome-wide association analysis of autoantibody positivity in type 1 diabetes cases.	Type_1_diabetes	8,506 European ancestry cases, up to 10,596 European ancestry controls
2017-02-17	27189021	Cook JP	2016-05-18	Eur J Hum Genet	www.ncbi.nlm.nih.gov/pubmed/27189021	Multi-ethnic genome-wide association study identifies novel locus for type 2 diabetes susceptibility.	Type_2_diabetes	746 African American cases, 2,825 African American controls, 743 East Asian ancestry cases, 3,992 East Asian ancestry controls, 7,111 European ancestry cases, 49,688 European ancestry controls, 1,147 Latino cases, 5,352 Latino controls
2017-06-02	28067908	de Lange KM	2017-01-09	Nat Genet	www.ncbi.nlm.nih.gov/pubmed/28067908	Genome-wide association study implicates immune activation of multiple integrin genes in inflammatory bowel disease.	Crohn_s_disease	12,194 European and unknown ancestry cases, 28,072 European and unknown ancestry controls
2017-02-19	27399966	Morris DL	2016-07-11	Nat Genet	www.ncbi.nlm.nih.gov/pubmed/27399966	Genome-wide association meta-analysis in Chinese and European individuals identifies ten new loci associated with systemic lupus erythematosus.	Systemic_lupus_erythematosus	1,659 Chinese ancestry cases, 3,398 Chinese ancestry controls, 4,036 European ancestry cases, 6,959 European ancestry controls
2017-02-24	27296613	Salinas YD	2016-06-13	BMC Genet	www.ncbi.nlm.nih.gov/pubmed/27296613	Multiethnic genome-wide association study identifies ethnic-specific associations with body mass index in Hispanics and African Americans.	BMI	1,235 Hispanic individuals, 706 Asian ancestry individuals, 1,549 African American individuals, 2,395 European ancestry individuals
2016-01-27	25673413	Locke AE	2015-02-12	Nature	www.ncbi.nlm.nih.gov/pubmed/25673413	Genetic studies of body mass index yield new insights for obesity biology.	BMI	up to 104,666 European ancestry male individuals, up to 132,115 European ancestry female individuals, 370 African American male individuals, 517 African American female individuals, 512 Hispanic male individuals, 764 Hispanic female individuals
2017-08-18	28448500	Graff M	2017-04-27	PLoS Genet	www.ncbi.nlm.nih.gov/pubmed/28448500	Genome-wide physical activity interactions in adiposity - A meta-analysis of 200,452 adults.	BMI	2,518 African American women, 86,278 European ancestry women, 1,773 Filipino ancestry women, 1,030 Indian ancestry women, 1,457 African American men, 55,137 European ancestry men, 7,648 Indian ancestry men, 5,527 European ancestry individuals
2017-08-18	28448500	Graff M	2017-04-27	PLoS Genet	www.ncbi.nlm.nih.gov/pubmed/28448500	Genome-wide physical activity interactions in adiposity - A meta-analysis of 200,452 adults.	BMI	1,957 African American women, 1,773 Filipino ancestry women, 305 Indian ancestry women, 67,609 European ancestry women, 1,206 African American men, 2,029 Indian ancestry men, 43,399 European ancestry men, at least 4,819 European ancestry individuals
2017-08-10	28443625	Justice AE	2017-04-26	Nat Commun	www.ncbi.nlm.nih.gov/pubmed/28443625	Genome-wide meta-analysis of 241,258 adults accounting for smoking behaviour identifies novel loci for obesity traits.	BMI	98,173 European ancestry women, 64,373 European ancestry men, 5,829 European ancestry individuals, 10,500 African American/Afro-Caribbean ancestry women, 2,706 African American/Afro-Caribbean ancestry men, 1,030 Indian Asian ancestry women, 7,648 Indian Asian ancestry men, 1,793 Filipino ancestry women, 2,944 Hispanic/Latino ancestry women, 1,764 Hispanic/Latino ancestry men
2018-04-26	25751624	Onengut-Gumuscu S	2015-04-01	Nat Genet	www.ncbi.nlm.nih.gov/pubmed/25751624	Fine mapping of type 1 diabetes susceptibility loci and evidence for colocalization of causal variants with lymphoid gene enhancers.	Type_1_diabetes	6,683 European ancestry cases, 12,173 European ancestry controls, 2,601 European ancestry affected sibling pair families, 69 European ancestry trios
2018-03-29	29358691	Bonas-Guarch S	2018-01-22	Nat Commun	www.ncbi.nlm.nih.gov/pubmed/29358691	Re-analysis of public genetic data reveals a rare X-chromosomal variant associated with type 2 diabetes.	Type_2_diabetes	up to 12,931 European ancestry cases, up to 57,196 European ancestry controls
2018-03-29	29358691	Bonas-Guarch S	2018-01-22	Nat Commun	www.ncbi.nlm.nih.gov/pubmed/29358691	Re-analysis of public genetic data reveals a rare X-chromosomal variant associated with type 2 diabetes.	Type_2_diabetes	19,693 European ancestry cases, 107,308 European ancestry controls, 6,952 East Asian ancestry cases, 11,865 East Asian ancestry controls, 5,561 South Asian ancestry cases, 14,458 South Asian ancestry controls, 1,804 Mexican ancestry cases, 779 Mexican ancestry controls
2018-07-16	29358691	Bonas-Guarch S	2018-01-22	Nat Commun	www.ncbi.nlm.nih.gov/pubmed/29358691	Re-analysis of public genetic data reveals a rare X-chromosomal variant associated with type 2 diabetes.	Type_2_diabetes	7,522 European ancestry cases, 50,446 European ancestry controls
2017-08-10	28443625	Justice AE	2017-04-26	Nat Commun	www.ncbi.nlm.nih.gov/pubmed/28443625	Genome-wide meta-analysis of 241,258 adults accounting for smoking behaviour identifies novel loci for obesity traits.	BMI	77,279 European ancestry women, 47,280 European ancestry men, 4,856 European ancestry individuals, 8,799 African American/Afro-Caribbean ancestry women, 1,803 African American/Afro-Caribbean ancestry men, 1,020 Indian Asian ancestry women, 6,691 Indian Asian ancestry men, 1,526 Filipino ancestry women, 2,469 Hispanic/Latino ancestry women, 1,318 Hispanic/Latino ancestry men
2017-10-09	19838195	Gateva V	2009-11-01	Nat Genet	www.ncbi.nlm.nih.gov/pubmed/19838195	A large-scale replication study identifies TNIP1, PRDM1, JAZF1, UHRF1BP1 and IL10 as risk loci for systemic lupus erythematosus.	Systemic_lupus_erythematosus	1,310 European ancestry cases, 7,859 European ancestry controls
2018-05-08	23143596	Eyre S	2012-12-01	Nat Genet	www.ncbi.nlm.nih.gov/pubmed/23143596	High-density genetic mapping identifies new susceptibility loci for rheumatoid arthritis.	Rheumatoid_arthritis	up to 13,838 European ancestry cases, up to 33,742 European ancestry controls
2018-05-08	23143596	Eyre S	2012-12-01	Nat Genet	www.ncbi.nlm.nih.gov/pubmed/23143596	High-density genetic mapping identifies new susceptibility loci for rheumatoid arthritis.	Rheumatoid_arthritis	up to 9,585 European ancestry cases, up to 33,742 European ancestry controls
2017-10-20	28869590	Zhao W	2017-09-04	Nat Genet	www.ncbi.nlm.nih.gov/pubmed/28869590	Identification of new susceptibility loci for type 2 diabetes and shared etiological pathways with coronary heart disease.	Type_2_diabetes	6,353 South Asian ancestry cases, 7,179 South Asian ancestry controls, 3,871 European ancestry cases, 16,427 European ancestry controls, 34,840 cases, 114,981 controls
2017-09-22	28566273	Scott RA	2017-05-31	Diabetes	www.ncbi.nlm.nih.gov/pubmed/28566273	An Expanded Genome-Wide Association Study of Type 2 Diabetes in Europeans.	Type_2_diabetes	up to 26,676 European ancestry cases, up to 132,532 European ancestry controls
2018-04-25	22057235	Trynka G	2011-11-06	Nat Genet	www.ncbi.nlm.nih.gov/pubmed/22057235	Dense genotyping identifies and localizes multiple common and rare variant association signals in celiac disease.	Celiac_disease	11,812 European ancestry cases, 229 Indian ancestry cases, 11,837 European ancestry controls, 391 Indian ancestry controls
2018-07-16	29358691	Bonas-Guarch S	2018-01-22	Nat Commun	www.ncbi.nlm.nih.gov/pubmed/29358691	Re-analysis of public genetic data reveals a rare X-chromosomal variant associated with type 2 diabetes.	Type_2_diabetes	5,277 European ancestry cases, 15,702 European ancestry controls
2018-07-02	29615537	Kulminski AM	2018-03-01	Aging (Albany NY)	www.ncbi.nlm.nih.gov/pubmed/29615537	Strong impact of natural-selection-free heterogeneity in genetics of age-related phenotypes.	BMI	up to 33,431 European ancestry individuals
2018-06-21	27362418	Zhang H	2016-06-30	PLoS Genet	www.ncbi.nlm.nih.gov/pubmed/27362418	A Powerful Procedure for Pathway-Based Meta-analysis Using Summary Statistics Identifies 43 Pathways Associated with Type II Diabetes in European Populations.	Type_2_diabetes	19,809 European ancestry cases, 111,181 European ancestry controls
2018-06-29	28714469	Langefeld CD	2017-07-17	Nat Commun	www.ncbi.nlm.nih.gov/pubmed/28714469	Transancestral mapping and genetic load in systemic lupus erythematosus.	Systemic_lupus_erythematosus	6,748 European ancestry cases, 11,516 European ancestry controls, 2,970 African American cases, 2,452 African American controls, 1,872 Hispanic cases, 2,016 Hispanic controls
2018-07-09	29848360	Julia A	2018-05-30	Arthritis Res Ther	www.ncbi.nlm.nih.gov/pubmed/29848360	Genome-wide association study meta-analysis identifies five new loci for systemic lupus erythematosus.	Systemic_lupus_erythematosus	4,943 European ancestry cases, 8,483 European ancestry controls
2018-08-08	24532676	Kim K	2014-02-14	Ann Rheum Dis	www.ncbi.nlm.nih.gov/pubmed/24532676	High-density genotyping of immune loci in Koreans and Europeans identifies eight new rheumatoid arthritis risk loci.	Rheumatoid_arthritis	2,234 Korean ancestry cases, 7,065 Korean ancestry controls, 10,288 European ancestry cases, 35,502 European ancestry controls
2017-12-11	22885922	Morris AP	2012-09-01	Nat Genet	www.ncbi.nlm.nih.gov/pubmed/22885922	Large-scale association analysis provides insights into the genetic architecture and pathophysiology of type 2 diabetes.	Type_2_diabetes	6,377 European ancestry male cases, 5,794 European ancestry female cases, 22,243 European ancestry male controls, 34,619 European ancestry female controls
2018-07-24	26426971	Winkler TW	2015-10-01	PLoS Genet	www.ncbi.nlm.nih.gov/pubmed/26426971	The Influence of Age and Sex on Genetic Associations with Adult Body Size and Shape: A Large-Scale Genome-Wide Interaction Study.	BMI	up to 309,889 European ancestry individuals
